# Supplementary material for: Preclinical evaluation of CRISPR-based therapies for Noonan syndrome caused by deep-intronic LZTR1 variants
Source: PubMed Central journal article supplement (PMC10851011; doi:10.1016/j.omtn.2024.102123), 2024-01-23
Supplement: mmc1.pdf [file mmc1.pdf]

OMTN, Volume 35

## Supplemental information

### Preclinical evaluation of CRISPR-based therapies for Noonan syndrome caused by deep-intronic *LZTR1* variants

Carolin Knauer, Henrike Haltern, Eric Schoger, Sebastian Kügler, Lennart Roos, Laura C. Zelarayán, Gerd Hasenfuss, Wolfram-Hubertus Zimmermann, Bernd Wollnik, and Lukas Cyganek

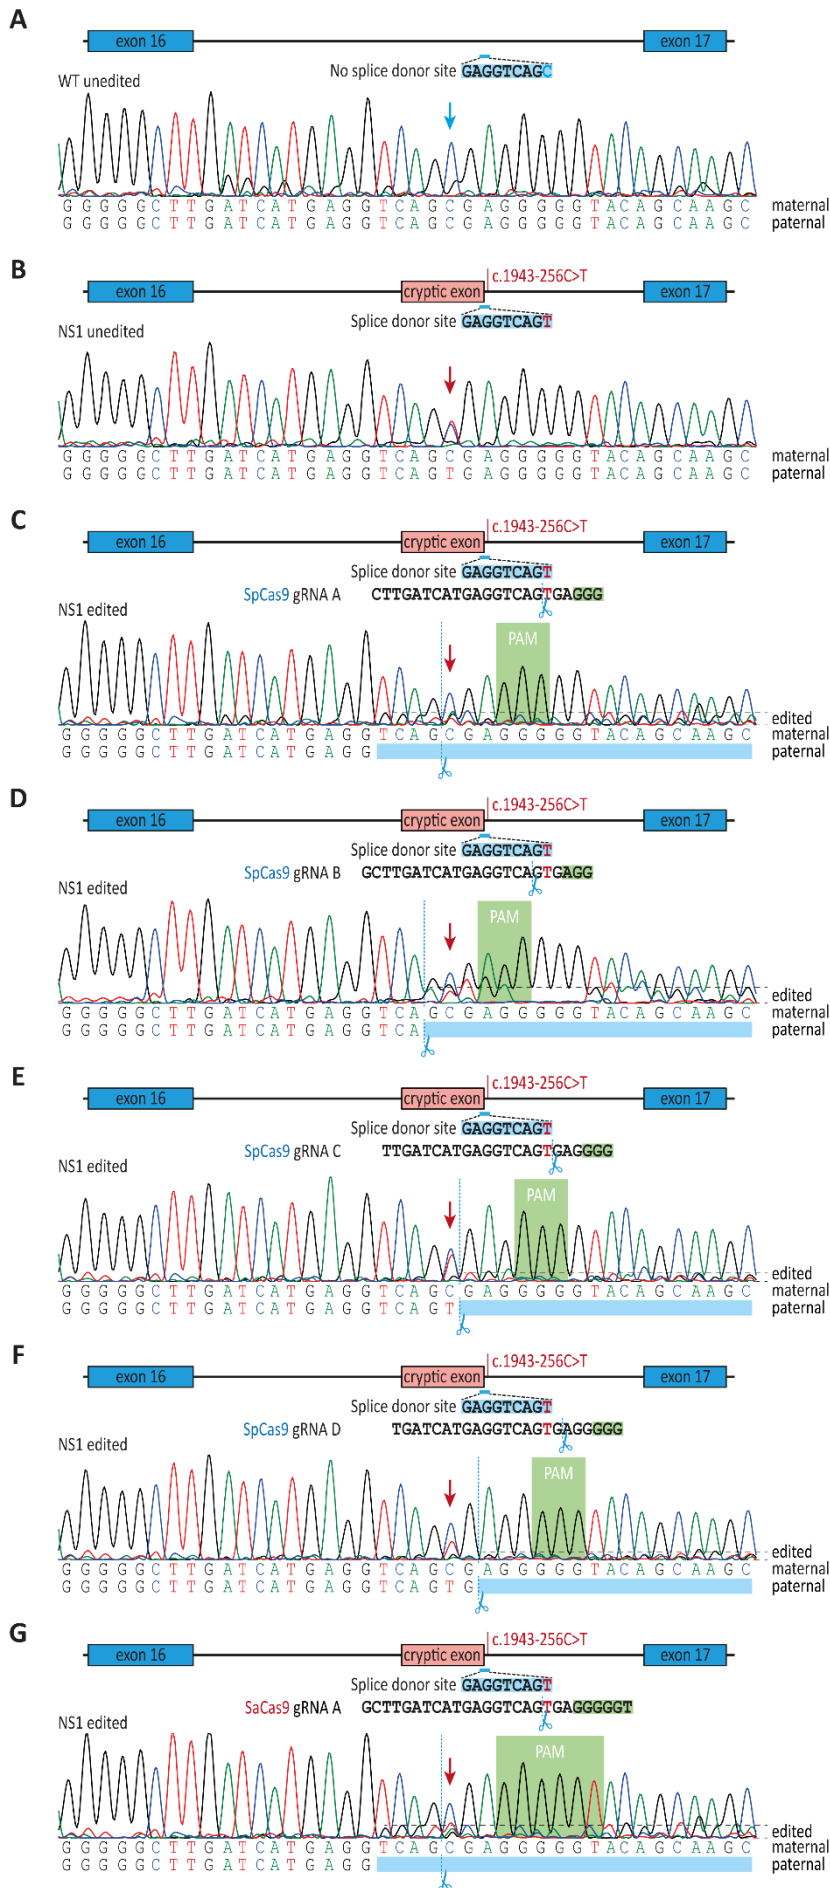

**Figure S1: Allele-specific targeting of the deep-intronic variant in *LZTR1* intron 16 by different CRISPR/Cas9 combinations in patient-specific iPSCs. (A,B)** Sanger sequencing of *LZTR1* intron 16 for WT (A) and NS1 (B). **(C-G)** Analysis of editing efficiencies of iPSCs from patient NS1 3-4 days post-transfection by Sanger sequencing for allele-specific disruption of the cryptic splice site using SpCas9 with guide RNA A (C), SpCas9 with guide RNA B (D), SpCas9 with guide RNA C (E), SpCas9 with guide RNA D (F), and SaCas9 with guide RNA A (G).

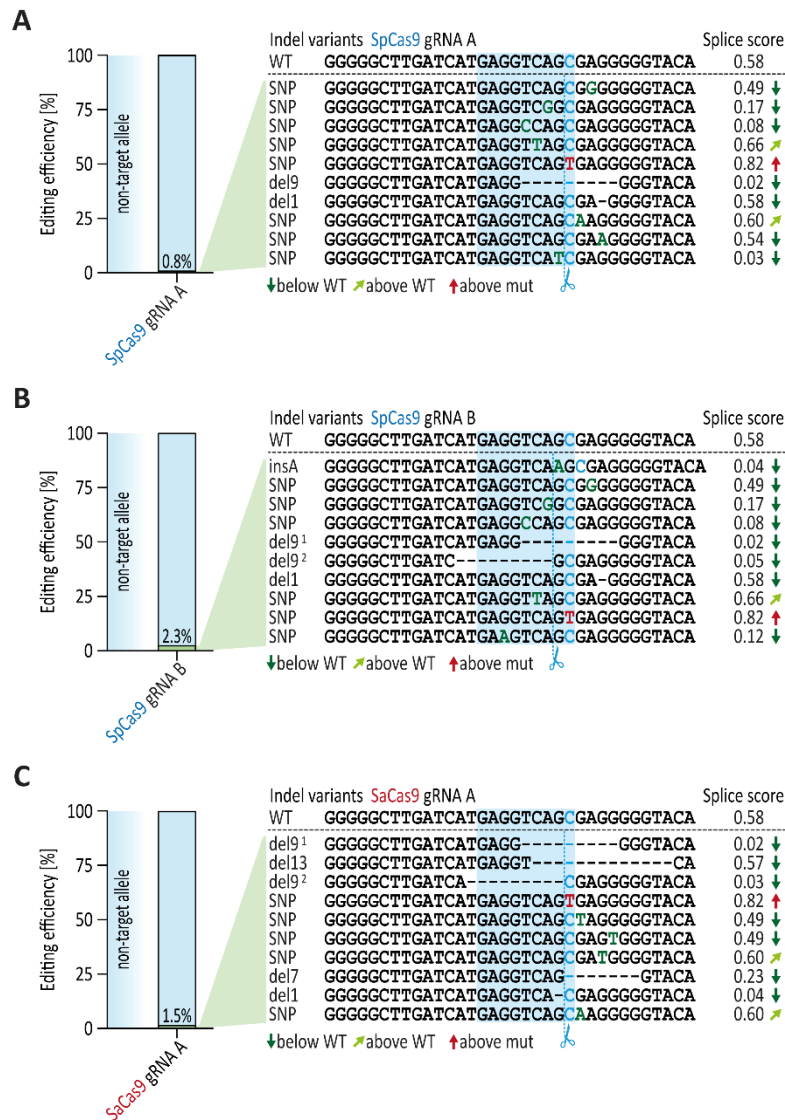

**Figure S2: Evaluation of editing specificity of the different CRISPR/Cas9 combinations targeting *LZTR1* intron 16 in WT iPSCs. (A-C) Analysis of off-target editing of the non-mutated *LZTR1* intron 16 locus in WT iPSCs 3-4 days post-transfection using amplicon sequencing and computational prediction of splice site motifs for SpCas9 and guide RNA A (A), for SpCas9 and guide RNA B (B), and for SaCas9 and guide RNA A (C).**

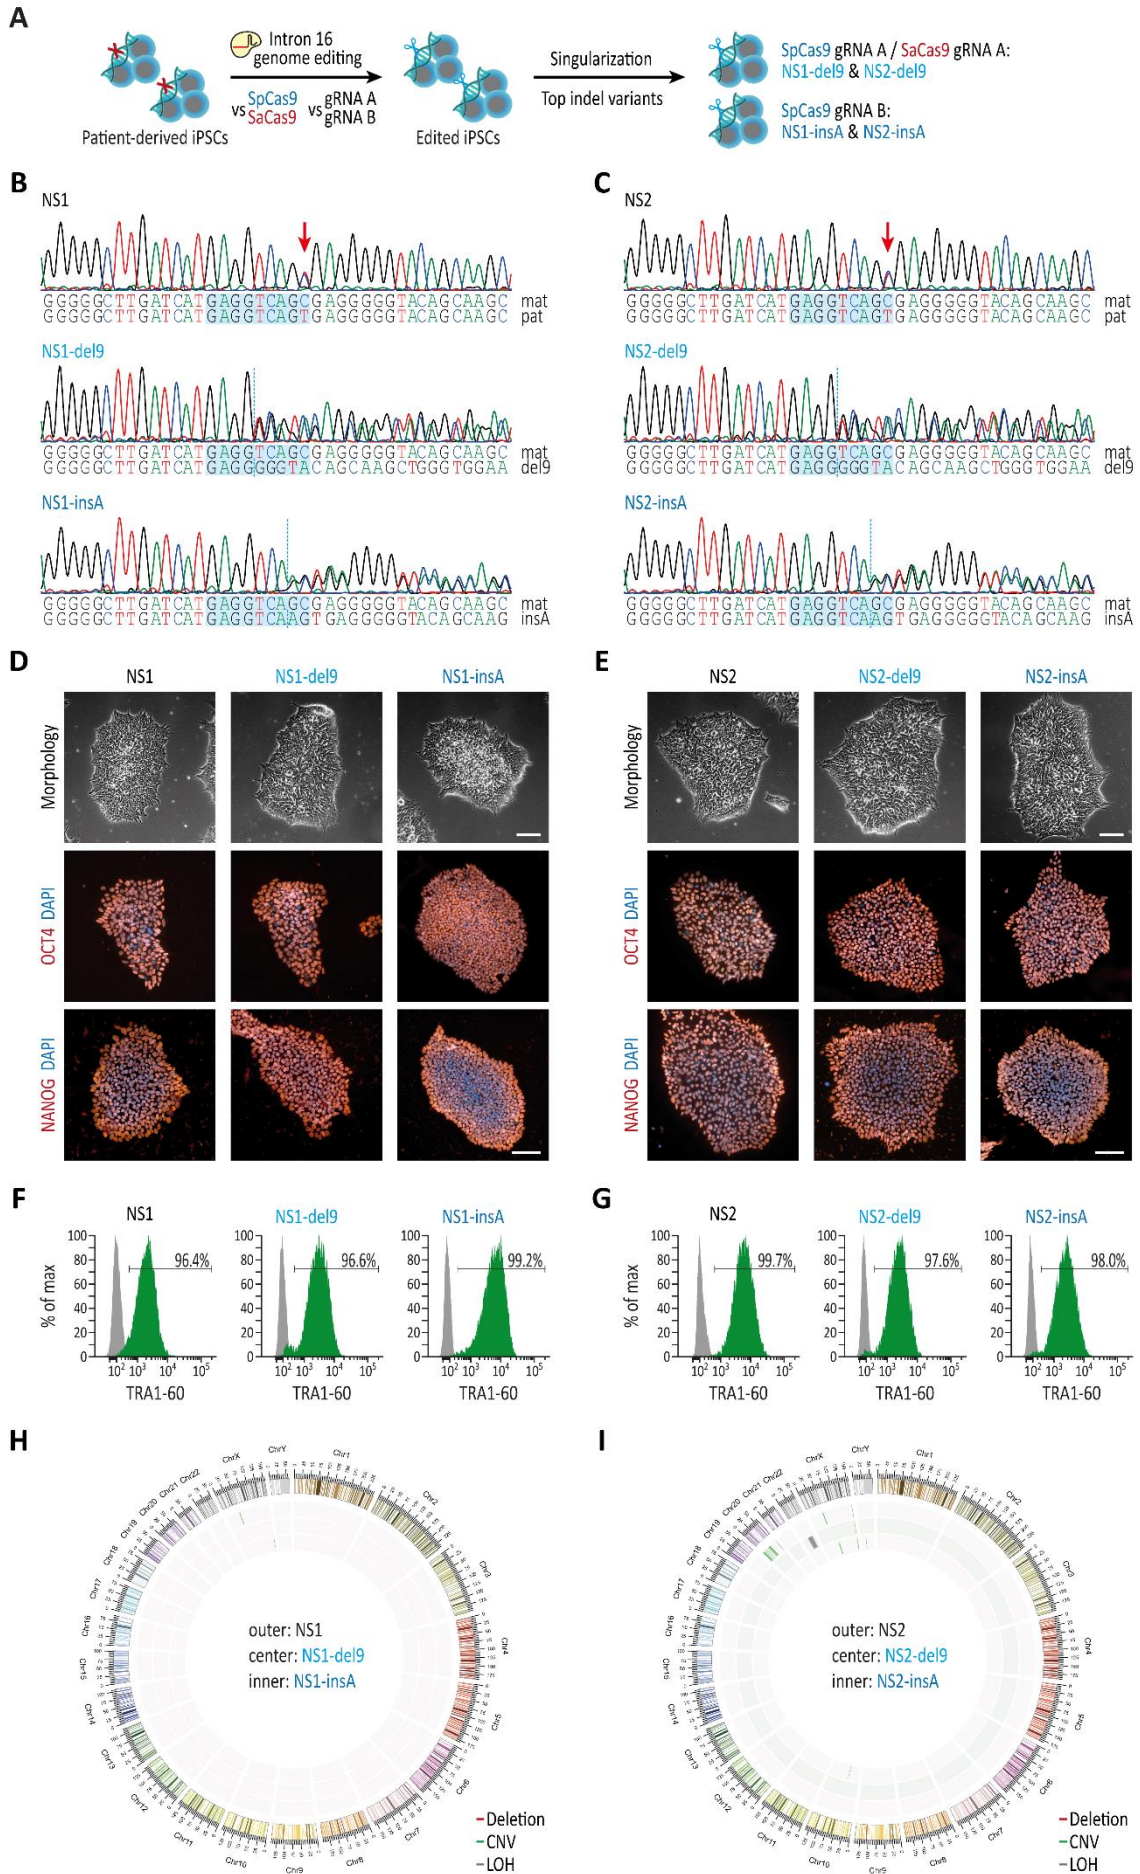

**Figure S3: Generation of isogenic iPSCs with top indel variants upon CRISPR/Cas9 editing of *LZTR1* intron 16 in patient-specific iPSCs.** (A) Generation of monoclonal CRISPR-edited iPSCs harboring the top indel variants for SpCas9/SaCas9 with guide RNA A and SpCas9 with guide RNA B by singularization of transfected bulks. (B,C) Sanger sequencing of unedited and CRISPR-edited iPSCs harboring the top indel variants 9-base pair deletion (del9) and 1-base pair insertion of adenosine (insA) derived from patients NS1 (B) and NS2 (C). (D,E) Patient-specific and CRISPR-edited iPSCs derived from patients NS1 (D) and NS2 (E) showed a typical human stem cell-like morphology and expressed the key pluripotency markers OCT3/4 and NANOG as assessed by light microscopy and immunocytochemistry; nuclei were counter-stained with Hoechst 33342 (blue); scale bar: 100  $\mu$ m. (F,G) Flow cytometry analysis of pluripotency marker TRA-1-60 revealed homogeneous populations of pluripotent cells in generated iPSC lines derived from patients NS1 (F) and NS2 (G). Gray peaks represent the negative controls. (H,I) Molecular karyotyping using a genome-wide microarray demonstrated chromosomal stability after genome editing of iPSCs derived from patients NS1 (H) and NS2 (I). CNV: copy number variation, LOH: loss of heterozygosity.

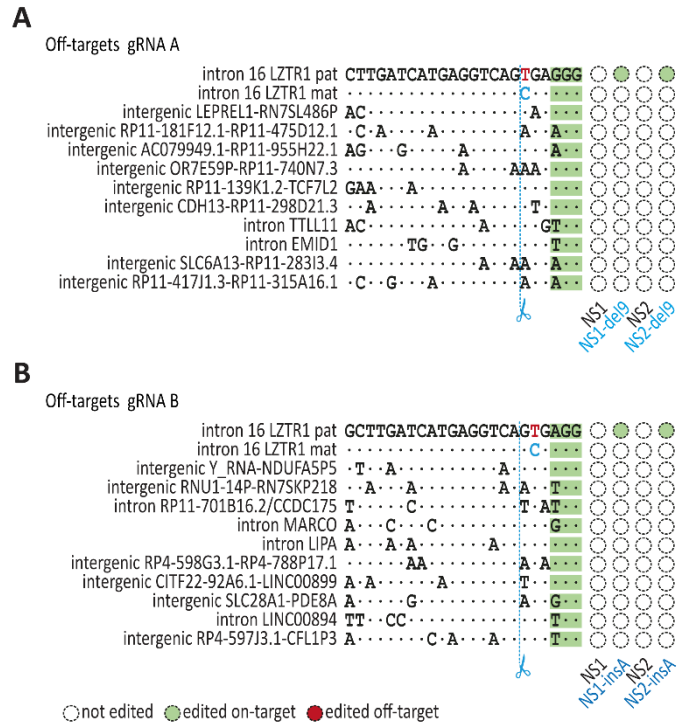

**Figure S4: Off-target screening in CRISPR-edited iPSCs.** (A,B) Sanger sequencing of the top ten predicted off-target regions, ranked by the CFD off-target score using CRISPOR, revealed no off-target editing of CRISPR/Cas9 in CRISPR-edited iPSCs compared to patient-derived cells for SpCas9 and guide RNA A (A) and SpCas9 and guide RNA B (B).

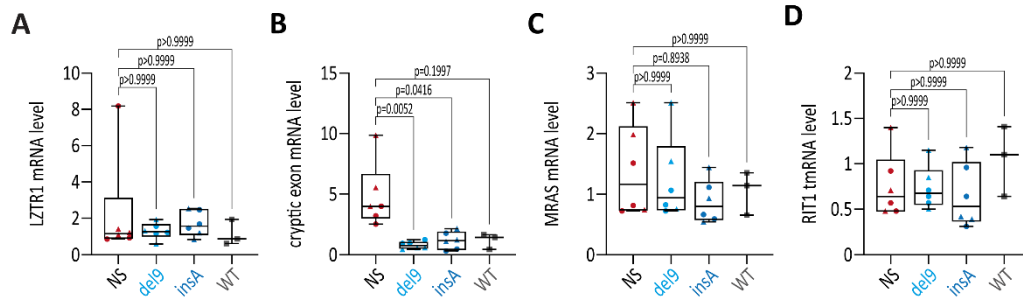

**Figure S5: Gene expression analysis in patient-specific and CRISPR-edited iPSC-CMs.**

(A-D) Quantitative gene expression analysis of *LZTR1* (A), *LZTR1* transcript including the cryptic exon (B), and *LZTR1* substrates *MRAS* (C), and *RIT1* (D) in patient-specific and CRISPR-edited iPSC-CMs at day 30 of differentiation, assessed by real-time PCR, revealed no expression differences at transcriptional level across all iPSC lines; samples were analyzed in triplicates and data were normalized to *GAPDH*, *RPL37A*, and *TUBB5* expression and WT controls; n=3 independent differentiations per iPSC line. Data were analyzed by nonparametric Kruskal-Wallis test with Dunn's correction and are presented as mean  $\pm$  SEM (A-D).



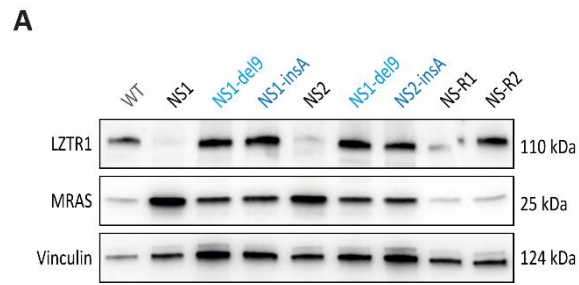

**Figure S6: Restoration of LZTR1 function and normalization of MRAS levels upon CRISPR/Cas9 editing of *LZTR1* intron 16 compared to parents' iPSC-CMs. (A)** Representative blots of LZTR1 and MRAS levels, assessed by Western blot, in patient-specific iPSC-CMs and CRISPR-corrected iPSC-CMs in comparison to iPSC-CMs from the father (NS-R1) and the mother (NS-R2) at day 30 of differentiation; Vinculin served as loading control.

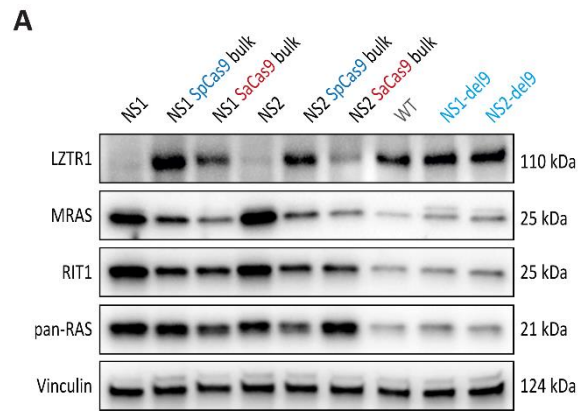

**Figure S7: Restoration of LZTR1 function and normalization of RAS GTPase levels upon CRISPR/Cas9 editing of *LZTR1* intron 16 in differentiated bulks. (A)** Representative blots of LZTR1 and RAS GTPase levels, assessed by Western blot, in iPSC-CMs at day 30 of differentiation transfected at iPSC level in comparison to unedited and monoclonal CRISPR-edited iPSC-CMs from the patients; Vinculin served as loading control.

**Table S1: Guide RNA target sequences targeting *LZTR1* intron 16.**

| <b>Guide RNA</b> | <b>Target sequence</b>  |
|------------------|-------------------------|
| guide RNA A      | (G)CTTGATCATGAGGTCAGTGA |
| guide RNA B      | GCTTGATCATGAGGTCAGTG    |
| guide RNA C      | TTGATCATGAGGTCAGTGAG    |
| guide RNA D      | TGATCATGAGGTCAGTGAGG    |

**Table S2: Primer sequences used for PCR, reverse transcriptase PCR and real-time PCR.**

| <b>Gene (gDNA)</b>           | <b>Primer</b>                                          |
|------------------------------|--------------------------------------------------------|
| LZTR1 In16                   | TGTAATGTCACAGGCCCTT /<br>TGTTGCTGCCCTGAACAAAA          |
| Guide RNA A<br>Off-target 1  | GCATAAAAGAAATGCCACAA /<br>GAAAGTAAATACAGGGAACAGAAAGC   |
| Guide RNA A<br>Off-target 2  | ATGGGTACACACCCTCTTC /<br>CATGTTCAAGTGCTGAGTACCAA       |
| Guide RNA A<br>Off-target 3  | GCTCCAAGTTTCCTGAATAGTTT /<br>TCTTCCGATCCAGTGTGTG       |
| Guide RNA A<br>Off-target 4  | CTACAAGGAACCCCAAAGG /<br>TGAGCTCTGTGCTCTATGCAG         |
| Guide RNA A<br>Off-target 5  | TGTCACCTTTGCCCTTCTTT /<br>CCGCCACATCTGTCTTCC           |
| Guide RNA A<br>Off-target 6  | TGAGGCTCTCAAGACACTGC /<br>AGAAACTTGCCAACCGTGCT         |
| Guide RNA A<br>Off-target 7  | CATCCCCTGCCAGTCTAAAA /<br>GCACAAGTCTGCAATAAATGG        |
| Guide RNA A<br>Off-target 8  | GACAAGTAGGAAGCTCTTTTTGG /<br>GGAGGAGATTCAGGACAGCA      |
| Guide RNA A<br>Off-target 9  | TCAATTGTGGCAGTGGTTTC /<br>GGGCCCATAGCTGTTTCTTT         |
| Guide RNA A<br>Off-target 10 | TGGGGACACGTTAGTGAACA /<br>AGGGCACCAATGATGTGTCT         |
| Guide RNA B<br>Off-target 1  | TGGGGAGAGGAATTCATGCA /<br>CCTACAAGTCCCGGTCATTG         |
| Guide RNA B<br>Off-target 2  | GCACCTCTCAATCCTCTGCT /<br>AGCCCATCCACCAAAAAGAAGA       |
| Guide RNA B<br>Off-target 3  | CGTCAAATGAGACTGAATCCCTCTA /<br>GCCTCCCATAGTGCTAGGATTAC |
| Guide RNA B<br>Off-target 4  | GGGCGCCACATGTTTGTATT /<br>TGCCCCTCATCATCTCTTGC         |
| Guide RNA B<br>Off-target 5  | AAGCCTCTTCCCTGCACTAA /<br>GCAAGGAAGGTGTTGTACTCC        |
| Guide RNA B<br>Off-target 6  | ATTTTTCAAGCCCTGTGGTAAC /<br>AGAGACTTTTGCAATGTTCCAGT    |
| Guide RNA B<br>Off-target 7  | AGAGGCGCTGCAGTGAATTA /<br>CAGGAACCAAGGAAAGGCT          |

|                              |                                                     |
|------------------------------|-----------------------------------------------------|
| Guide RNA B<br>Off-target 8  | CTGCCCAATCCATTTTGCC /<br>TCCTGGGAATGGACTGACCT       |
| Guide RNA B<br>Off-target 9  | CCACAGCTGAAAAGCATCCC /<br>TGTTGGTGAGAGCCAGACAC      |
| Guide RNA B<br>Off-target 10 | GTGTGGGGACAGATAAGTGGA /<br>CCTTCCTGGGAGCTTGTGTT     |
| <b>Gene (RT-PCR)</b>         | <b>Primer</b>                                       |
| GAPDH                        | AGAGGCAGGGATGATGTTCT /<br>TCTGCTGATGCCCCATGTT       |
| LZTR1 Ex16-17                | GTAAAGGAGTCCCCTTCAAC /<br>GCAACAGAGTGATGTCACAG      |
| LZTR1 Ex1                    | ATGGCTGGACCGGGCAGCA /<br>ACCCACGAACTCGTCGCAGG       |
| <b>Gene (real-time)</b>      | <b>Primer</b>                                       |
| GAPDH                        | GGAGCGAGATCCCTCCAAAAT /<br>GGCTGTTGTCATACTTCTCATGG  |
| LZTR1 Ex6-7                  | GCAACGCCAGGTTGAATGAC /<br>GAGCAGGTGTTTCAGTTGGGA     |
| LZTR1 In16-Ex17              | GGACATTGGCCCCTTCATTC /<br>TGTGCCTCATGATCAAGCCC      |
| MRAS                         | CCACCATTGAAGACTCCTACCTG /<br>ACGGAGTAGACGATGAGGAAGC |
| RIT1                         | TTCATCAGCCACCGATTCCC /<br>GCAGGCTCATCATCAATACGG     |
| RPL37A                       | GTGGTTCCTGCATGAAGACAGTG /<br>TTCTGATGGCGGACTTTACCG  |
| TUBB5                        | CTGGACCGCATCTCTGTGTACT /<br>GCCAAAAGGACCTGAGCGAACA  |

**Table S3: Antibodies used for Western blot, immunocytochemistry and flow cytometry.**

| <b>Primary antibody</b>               | <b>Supplier</b>          | <b>Resource ID</b> |
|---------------------------------------|--------------------------|--------------------|
| $\alpha$ -actinin monoclonal mouse    | Sigma-Aldrich            | RRID:AB_476766     |
| $\beta$ -actin monoclonal mouse       | Santa Cruz               | RRID:AB_1119529    |
| Cas9 polyclonal rabbit                | Diagenode                | RRID:AB_2715516    |
| HA-Tag monoclonal rabbit              | Cell Signaling           | RRID:AB_2798368    |
| LZTR1 monoclonal rabbit               | Abcam                    | RRID:AB_3076250    |
| MLC2V polyclonal rabbit               | Proteintech              | RRID:AB_2147453    |
| MRAS polyclonal rabbit                | Proteintech              | RRID:AB_10950895   |
| NANOG monoclonal mouse                | Thermo Fisher Scientific | RRID:AB_2536677    |
| OCT3/4-PE monoclonal human            | Miltenyi Biotec          | RRID:AB_2784442    |
| pan-RAS monoclonal mouse              | Merck Millipore          | RRID:AB_2121151    |
| RIT1 polyclonal rabbit                | Abcam                    | RRID:AB_882379     |
| TRA-1-60-Alexa488 monoclonal mouse    | BD Biosciences           | RRID:AB_1645379    |
| Vinculin monoclonal mouse             | Sigma-Aldrich            | RRID:AB_477629     |
| <b>Secondary antibody</b>             | <b>Supplier</b>          | <b>Resource ID</b> |
| Alexa488 polyclonal goat anti-rabbit  | Thermo Fisher Scientific | RRID:AB_143165     |
| Alexa555 polyclonal donkey anti-mouse | Thermo Fisher Scientific | RRID:AB_2536180    |
| HRP polyclonal donkey anti-rabbit     | Sigma-Aldrich            | RRID:AB_2722659    |
| HRP polyclonal donkey anti-mouse      | Sigma-Aldrich            | RRID:AB_772210     |

**Table S4: Plasmids used for virus production.**

| <b>Plasmid</b>                | <b>Supplier</b> | <b>Resource ID</b>  |
|-------------------------------|-----------------|---------------------|
| Lenti_SaCRISPR_GFP            | Addgene         | RRID:Addgene_118636 |
| LentiCRISPRv2GFP              | Addgene         | RRID:Addgene_82416  |
| pMD2.G                        | Addgene         | RRID:Addgene_12259  |
| psPAX2                        | Addgene         | RRID:Addgene_12260  |
| pAAV-CMV-SauriCas9            | Addgene         | RRID:Addgene_135964 |
| pAAV-TNNT2-SauriCas9-U6-sgRNA | This study      | -                   |
| pAAV-TNNT2-SaCas9-U6-sgRNA    | This study      | -                   |
| pAAV-TNNT2-SlugCas9-U6-sgRNA  | This study      | -                   |
